# Supplementary material for: ATACseqQC: a Bioconductor package for post-alignment quality assessment of ATAC-seq data
Source: PubMed Central journal article supplement (PMC5831847; doi:10.1186/s12864-018-4559-3), 2018-03-01

**A**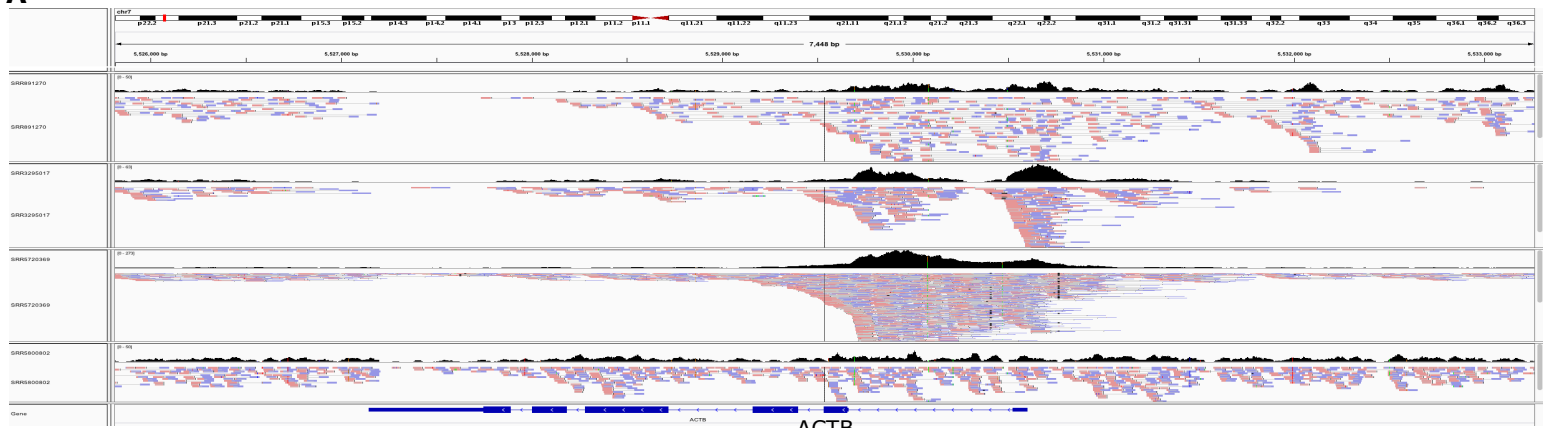**B**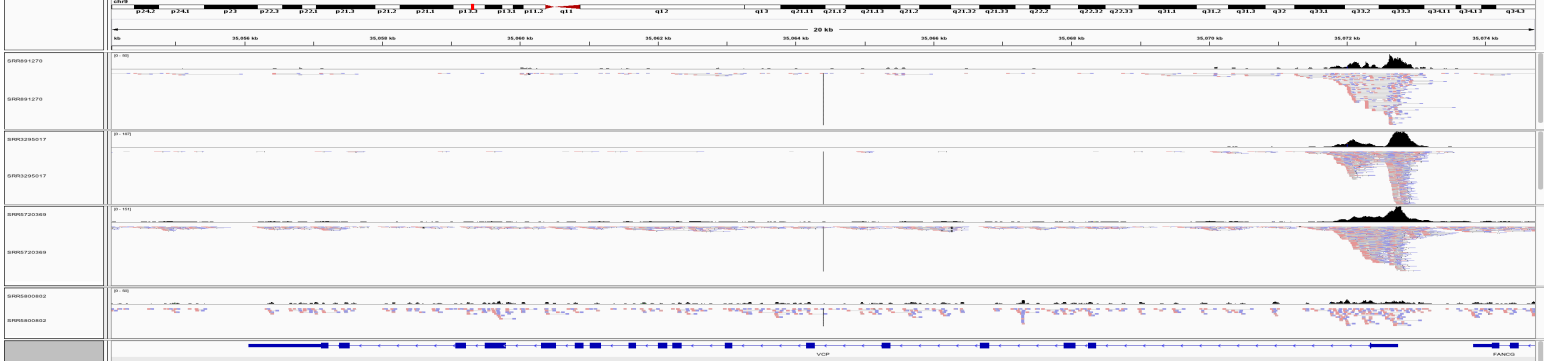**C**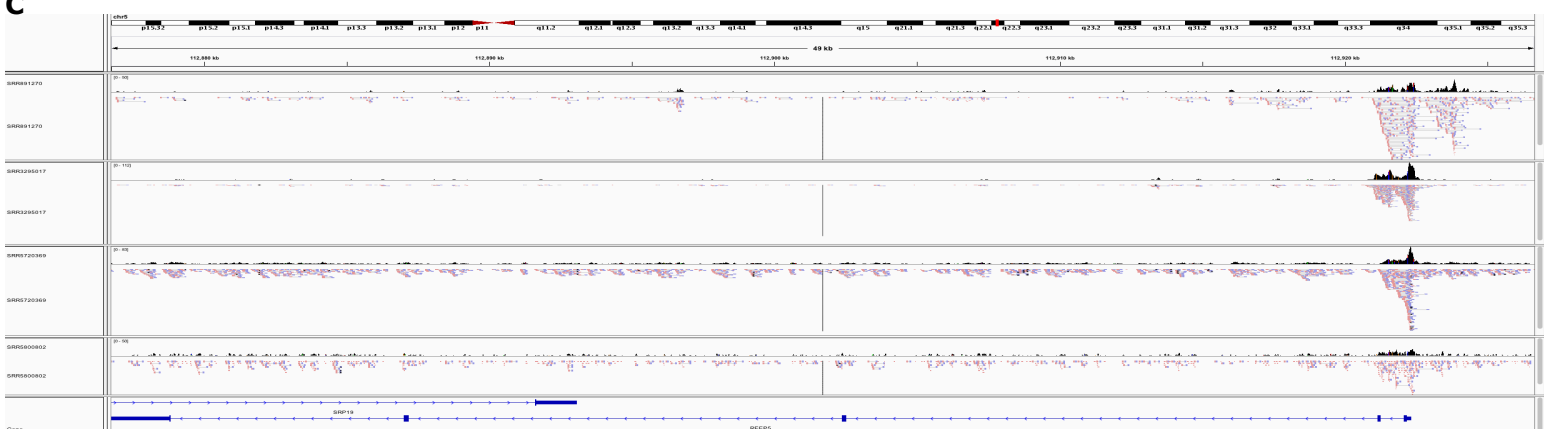**D**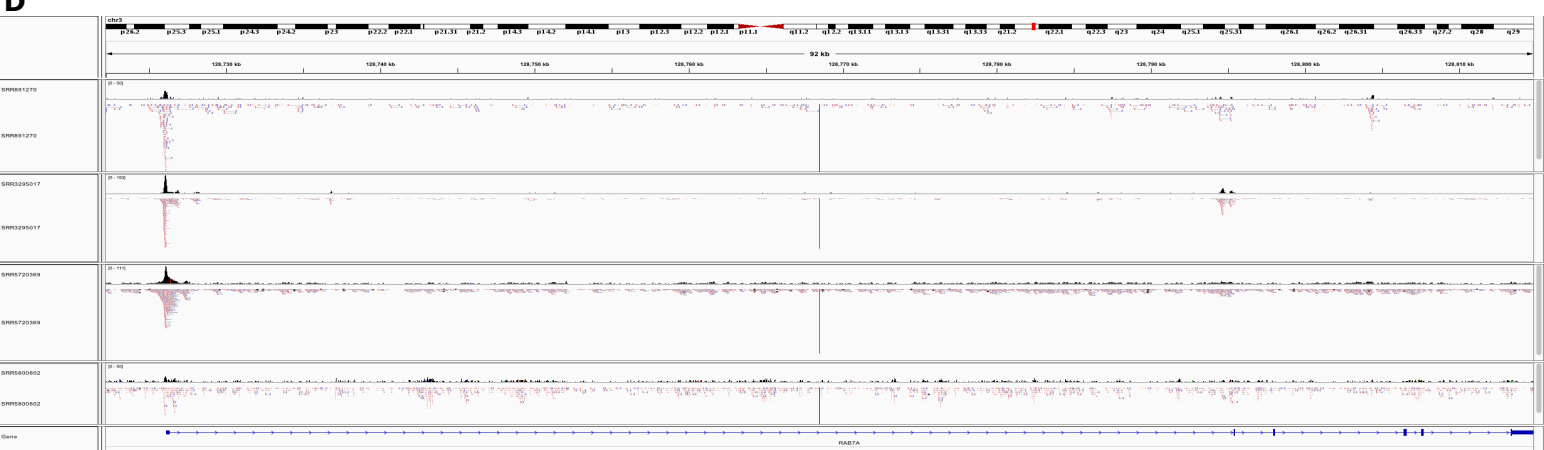**E**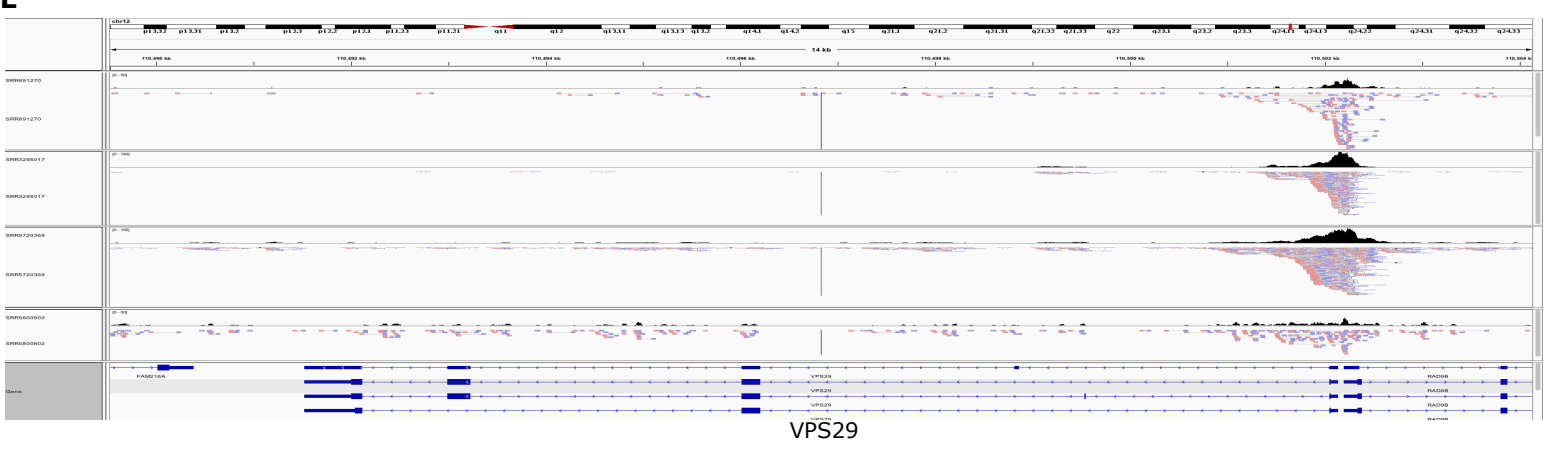

Supplement: 12864_2018_4559_MOESM5_ESM.pdf [file 12864_2018_4559_MOESM5_ESM.pdf]
